# Supplementary material for: The Light Sword Lens - A novel method of presbyopia compensation: Pilot clinical study
Source: PLoS One. 2019 Feb 4;14(2):e0211823. doi: 10.1371/journal.pone.0211823 (PMC6361462; doi:10.1371/journal.pone.0211823)
Supplement: S1 Dataset — (XLSX) [file pone.0211823.s002.xlsx]

## Sheet: Arkusz1
							REF VA trial							LSL VA trial							STENO VA trial							REF CS trial		LSL CS trial		STENO trial
				BCDVA Corr			ETDRS test distance [m]							ETDRS test distance [m]							ETDRS test distance [m]							P-R test distance [m]		P-R test distance [m]		P-R test distance [m]
Patient no	Age	Sex	Dominant eye	Sph	Cyl	Ax	5	2	1	0.67	0.5	0.4	0.33	5	2	1	0.67	0.5	0.4	0.33	5	2	1	0.67	0.5	0.4	0.33	3	0.4	3	0.4	3	0.4
	[years]	[M/F]	[R/L]	[dioptres]	[dioptres]	[degrees]	[logMAR]	[logMAR]	[logMAR]	[logMAR]	[logMAR]	[logMAR]	[logMAR]	[logMAR]	[logMAR]	[logMAR]	[logMAR]	[logMAR]	[logMAR]	[logMAR]	[logMAR]	[logMAR]	[logMAR]	[logMAR]	[logMAR]	[logMAR]	[logMAR]	[logCS]	[logCS]	[logCS]	[logCS]	[logCS]	[logCS]
							BCDVA	BCDVA	BCDVA	BCDVA	BCDVA	BCDVA	BCDVA	BCDVA with Light Sword Lens	BCDVA with Light Sword Lens	BCDVA with Light Sword Lens	BCDVA with Light Sword Lens	BCDVA with Light Sword Lens	BCDVA with Light Sword Lens	BCDVA with Light Sword Lens	BCDVA with pinhole 1,25mm	BCDVA with pinhole 1,25mm	BCDVA with pinhole 1,25mm	BCDVA with pinhole 1,25mm	BCDVA with pinhole 1,25mm	BCDVA with pinhole 1,25mm	BCDVA with pinhole 1,25mm	BCDVA	BCDVA with addition 2,5D	BCDVA with Light Sword Lens	BCDVA with Light Sword Lens	BCDVA with pinhole 1,25mm	BCDVA with pinhole 1,25mm
1	57	M	L	0	0	0	0	0.1	0.3	0.5	0.6	0.8	0.8	0.3	0.1	0.1	0.2	0.2	0.3	0.4	0.1	0.1	0.2	0.3	0.4	0.4	0.5	2	2	2	1.9	2	1.9
2	51	M	R	0.5	0	0	0	0	0.1	0.2	0.4	0.5	0.6	0.2	0.2	0.1	0.1	0	0	0	0.1	0.1	0.1	0.2	0.2	0.2	0.3	2	2	1.8	1.8	1.2	1.5
3	54	M	R	0	0	0	-0.2	0	0.1	0.3	0.5	0.5	0.6	0.3	0.1	0.2	0.3	0.2	0.3	0.3	0	0	0.1	0.1	0.1	0.2	0.3	2	2	2	2	1.4	1.3
4	47	M	L	1.75	0	0	0	0.2	0.2	0.3	0.5	0.5	0.6	0.6	0.3	0.2	0.1	0.1	0.1	0.1	0.1	0.1	0.2	0.1	0.1	0.1	0.2	2	2	2	2	1.7	1.6
5	62	M	R	0	0	0	0	0.1	0.2	0.2	0.3	0.4	0.5	0.1	-0.1	0	0.1	0.1	0.1	0.2	0	0	0.1	0.1	0.2	0.2	0.4	2	1.9	2	2	2	1.8
6	55	M	L	0.5	0	0	0	0	0.2	0.3	0.4	0.5	0.6	-0.1	0	0	0.1	0.1	0.2	0.2	0	0.1	0.2	0.1	0.2	0.3	0.3	2	2	2	1.2	2	1.6
7	52	M	R	0.25	-0.5	20	0	0	0.2	0.3	0.4	0.6	0.7	0	0	0.2	0.1	0.1	0.2	0.2	0	0.1	0.1	0.1	0.1	0.1	0.1	2	2	1.8	1.8	1.5	1.2
8	59	M	R	1.5	0	0	-0.1	-0.1	0	0.4	0.5	0.6	0.7	0.2	0.1	0.1	0.2	0.1	0.1	0.1	0	0.1	0.1	0.2	0.1	0.1	0.1	2	2	1.5	1.7	1.7	1.5
9	56	M	R	0	0	0	0	0	0.2	0.4	0.6	0.6	0.8	0	0	0.1	0.2	0.2	0.1	0.1	0.1	0.1	0.2	0.2	0.2	0.3	0.3	2	2	1.4	2	1.4	1
10	55	F	L	0.5	0	0	0	0	0.3	0.3	0.2	0.5	0.5	0.2	0.1	0.1	0	0.2	0.2	0.4	0	0.1	0.1	0.1	0.2	0.2	0.3	2	1.9	1.9	1.9	1.7	1.5
11	59	M	L	1	0	0	-0.1	-0.1	0.1	0.5	0.6	0.8	0.8	0.5	0.3	0.1	0.1	0.1	0.1	0.2	0	0.1	0.2	0.3	0.3	0.3	0.4	2	1.8	1.4	1.8	1.4	1.3
12	59	F	R	0.5	0	0	0	0.3	0.4	0.4	0.6	0.6	0.7	0.5	0.4	0.4	0.5	0.6	0.4	0.5	0.1	0.2	0.3	0.5	0.6	0.7	0.7	2	1.9	2	2	1.8	1.3
13	48	F	R	0	-0.5	180	0	0	0.1	0.1	0.2	0.4	0.6	0	0	0	0	0	0.2	0.2	0.1	0.1	0.1	0.1	0.1	0.1	0.2	2	2	2	2	2	1.8
14	52	F	R	0	0	0	0	0.1	0.4	0.5	0.5	0.6	0.8	0	0.1	0.1	0.1	0.2	0.1	0.1	0	0.1	0.1	0.1	0.2	0.2	0.3	2	1.7	1.7	1.7	1.4	1.1
15	47	F	L	1.5	-0.5	0	-0.1	0	0	0	0.1	0.2	0.5	0.2	0.2	0.3	0.1	0.2	0.1	0.1	0.2	0.1	0	0.1	0.2	0.2	0.2	2	1.9	2	1.8	1.6	1.3
16	62	F	R	1	0	0	0	0	0.1	0.3	0.5	0.6	0.7	0	0	0.1	0.1	0.1	0.2	0.3	0	0	0.1	0.1	0.2	0.2	0.3	2	2	2	2	1.9	1.8
17	57	F	L	1.75	0	0	0	0.1	0.3	0.6	0.6	0.6	0.8	0.1	0.1	0.2	0.3	0.3	0.3	0.4	0.1	0.2	0.3	0.3	0.4	0.4	0.5	2	1.9	1.9	1.8	1.8	1.6
18	60	F	R	0	0	0	0	0.2	0.3	0.3	0.4	0.6	0.7	0	0	0.2	0	0	0	0.3	0.1	0	0.1	0	0	0.1	0.2	2	2	2	1.9	1.9	1.9
19	60	M	R	1.25	0	0	0	0	0.1	0.2	0.3	0.3	0.5	0	0	0	0	0	0.1	0.2	0	0.1	0.3	0.3	0.3	0.2	0.2	2	2	2	2	1.9	1.9
20	59	F	L	0	0	0	0	0.1	0.2	0.4	0.6	0.6	0.7	0.5	0.4	0.4	0.4	0.4	0.5	0.7	0.1	0.2	0.3	0.6	0.6	0.7	0.7	2	2	2	2	1.7	1.3
21	57	F	R	1.75	0	0	0	0.1	0.2	0.4	0.4	0.5	0.7	0.1	0.1	0.3	0.3	0.3	0.4	0.5	0.2	0.1	0.3	0.3	0.4	0.4	0.4	2	1.8	1.8	1.6	1.8	1.5
22	54	M	L	0.5	0	0	-0.1	-0.1	0.1	0.3	0.5	0.6	0.6	0	0.1	0.2	0.2	0.3	0.4	0.5	0	0.1	0.1	0.1	0.2	0.3	0.2	2	2	1.5	2	1.7	1.4
23	55	M	R	0.5	0	0	0	0.1	0.3	0.3	0.4	0.5	0.7	0	0	0.2	0.1	0.1	0.2	0.1	0.1	0	0.2	0.1	0.2	0.3	0.3	2	2	1.8	1.8	1.6	1.2
24	52	M	R	1.5	0	0	0	0	0.1	0.3	0.5	0.7	0.8	0.5	0.3	0.5	0.2	0.1	0.2	0.2	0.1	0.2	0.2	0.2	0.2	0.3	0.4	2	2	2	2	2	1.5
25	62	F	L	1	0	0	0	0	0.1	0.2	0.3	0.5	0.6	0	0	0.1	0.1	0.2	0.3	0.3	0.1	0	0.1	0	0.1	0.3	0.2	2	2	2	2	2	1.9
26	51	M	L	0.75	0	0	0	0.1	0.1	0.1	0.2	0.4	0.5	0	0	0	0.1	0.1	0.2	0.2	0.2	0.2	0.2	0.1	0.2	0.3	0.3	2	2	1.6	1.7	1.6	1.6
27	55	F	R	0.5	0	0	-0.1	-0.1	0.1	0.3	0.5	0.6	0.8	0.3	0.2	0.2	0	0.1	0.1	0.3	0	0.1	0.2	0.1	0.1	0.2	0.3	2	1.8	2	1.9	1.7	1.3
28	57	M	R	0	0	0	0	0.1	0.1	0.4	0.6	0.8	0.9	0.2	0.1	0.2	0.2	0.1	0.2	0.3	0.1	0.2	0.3	0.4	0.4	0.5	0.4	2	2	2	2	1.9	1.7
29	52	F	L	0	0	0	0	0.2	0.4	0.6	0.7	0.7	0.8	-0.1	-0.1	0	0	0.1	0.1	0.3	0.1	0.1	0.1	0.1	0.1	0.2	0.3	2	1.7	2	1.7	1.7	1.1
30	56	M	L	0.5	0	0	0	-0.1	0	0.1	0.2	0.4	0.7	0.1	0.1	0.1	0.1	0.1	0	0.1	0	0.1	0.1	0.1	0.2	0.2	0.2	2	2	2	2	1.8	1.5
31	52	M	L	0	-0.5	160	0	0	0.1	0.2	0.3	0.4	0.6	0.1	0.1	0.1	0.1	0.1	0.2	0.2	0	0	0.1	0.1	0.1	0.1	0.1	2	1.8	1.8	1.8	1.8	1.3
32	47	M	R	1.5	0	0	0	0.1	0.3	0.3	0.4	0.4	0.5	0.4	0.4	0.3	0.1	0.1	0.1	0.1	0	0.1	0.2	0.1	0.1	0.1	0.2	1.9	2	2	2	1.7	1.5
33	47	F	R	1	0	0	-0.1	0	0.1	0.1	0.2	0.3	0.5	0	0	0.1	0	0.1	0.1	0.2	0.1	0.1	0.2	0.1	0.1	0.1	0.2	2	1.9	2	1.6	1.9	1.8
34	49	M	R	0	0	0	0	0	0.1	0.2	0.3	0.5	0.6	0.1	0.1	0	-0.1	0.1	0.1	0.1	0	0.1	0.1	0.1	0.1	0.1	0.2	2	2	2	1.8	1.4	1.3
MIN	47	M	R	0	-0.5		-0.2	-0.1	0	0	0.1	0.2	0.5	-0.1	-0.1	0	-0.1	0	0	0	0	0	0	0	0	0.1	0.1	1.9	1.7	1.4	1.2	1.2	1
Q1	52	20	20	0	0		0	0	0.1	0.2	0.3	0.425	0.6	0	0	0.1	0.1	0.1	0.1	0.1	0	0.1	0.1	0.1	0.1	0.125	0.2	2	1.9	1.8	1.8	1.6	1.3
Q2	55	F	L	0.5	0		0	0	0.1	0.3	0.4	0.5	0.7	0.1	0.1	0.1	0.1	0.1	0.2	0.2	0.1	0.1	0.15	0.1	0.2	0.2	0.3	2	2	2	1.9	1.7	1.5
Q3	58.5	14	14	1	0		0	0.1	0.275	0.4	0.5	0.6	0.775	0.275	0.175	0.2	0.2	0.2	0.2	0.3	0.1	0.1	0.2	0.2	0.2	0.3	0.375	2	2	2	2	1.9	1.675
MAX	62			1.75	0		0	0.3	0.4	0.6	0.7	0.8	0.9	0.6	0.4	0.5	0.5	0.6	0.5	0.7	0.2	0.2	0.3	0.6	0.6	0.7	0.7	2	2	2	2	2	1.9
MEAN	54.6176			0.632353	-0.0588235		-0.0235294	0.0411765	0.173529	0.302941	0.420588	0.532353	0.661765	0.155882	0.108824	0.152941	0.129412	0.15	0.182353	0.247059	0.0617647	0.0970588	0.164706	0.170588	0.211765	0.252941	0.3	1.99706	1.94118	1.87941	1.85882	1.72353	1.49412
